# Supplementary material
Source: HighWire-hosted journal article supplement (https://jnm.snmjournals.org/highwire/filestream/99056/field_highwire_adjunct_files/0/236265_Supplemental_Data.pdf)
Supplement: 236265_Supplemental_Data.pdf [file 236265_Supplemental_Data.pdf]

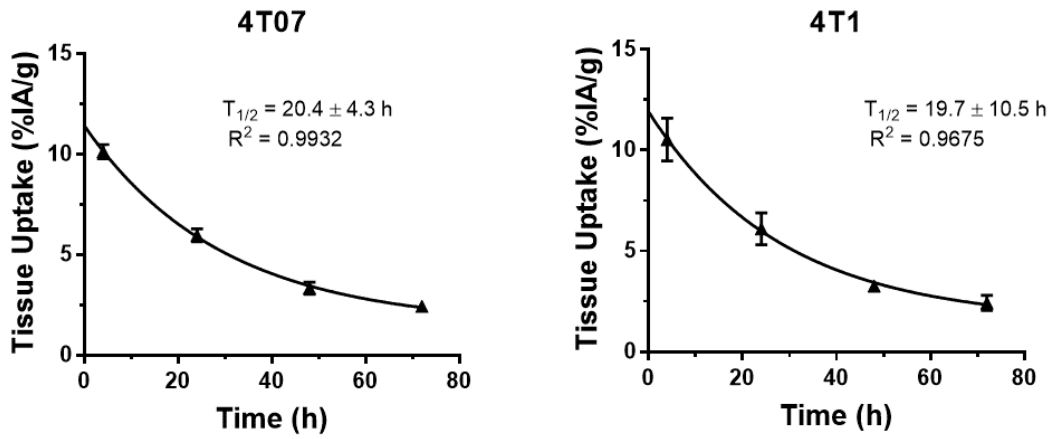

**Supplemental figure 1** Blood time-activity curves of  $^{86}\text{Y}$ -NM600 in Balb/C mice bearing syngeneic s.c. 4T07 or 4T1 breast tumors. Blood circulation half-life ( $T_{1/2}$ ) was calculated by fitting the quantitative PET data to a monoexponential decay. Similar circulation  $T_{1/2}$  were observed ( $20.4 \pm 4.3$  h vs.  $19.7 \pm 10.5$  h) between the two groups.

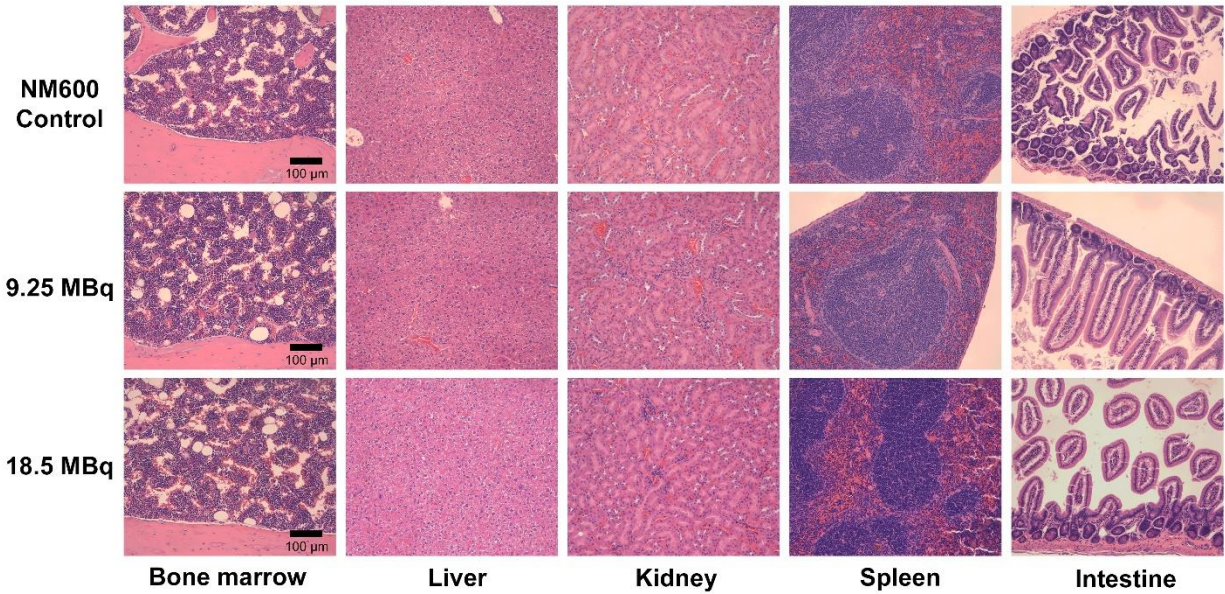

**Supplemental figure 2.** Histopathology examination of H&E tissue sections corresponding to the bone marrow, liver, kidney, spleen, and small intestine, six weeks after injection of NM600, or <sup>177</sup>Lu-NM600 9.25 MBq or 18.5 MBq. Similar tissue morphology was noted in all analyzed sections, indicating the absence of tissue degeneration. Scale bars represent 100 µm

**Supplemental table 1** Results of the region-of-interest analysis of the longitudinal PET/CT data in mice bearing 4T1 or 4T07 subcutaneous grafts and administered <sup>86</sup>Y-NM600 (9.25 MBq). Data are presented as %IA/g (mean ± SD).

| Time<br>(h p.i.)                      | Tumor<br>(%IA/g) |     | Heart/blood<br>(%IA/g) |     | Liver<br>(%IA/g) |     | Spleen<br>(%IA/g) |     | Kidneys<br>(%IA/g) |     | Muscle<br>(%IA/g) |     | Bone/Marrow<br>(%IA/g) |     | Whole Body<br>(%IA/g) |     |
|---------------------------------------|------------------|-----|------------------------|-----|------------------|-----|-------------------|-----|--------------------|-----|-------------------|-----|------------------------|-----|-----------------------|-----|
|                                       | Mean             | SD  | Mean                   | SD  | Mean             | SD  | Mean              | SD  | Mean               | SD  | Mean              | SD  | Mean                   | SD  | Mean                  | SD  |
| <b>86Y-NM600 in 4T1 bearing mice</b>  |                  |     |                        |     |                  |     |                   |     |                    |     |                   |     |                        |     |                       |     |
| <b>4</b>                              | 5.4              | 0.1 | 10.5                   | 1.1 | 10.2             | 1.0 | 4.5               | 0.4 | 5.7                | 0.4 | 2.0               | 0.3 | 2.2                    | 0.3 | 3.8                   | 0.5 |
| <b>24</b>                             | 11.0             | 1.3 | 6.1                    | 0.8 | 11.3             | 1.9 | 4.8               | 0.2 | 5.1                | 0.7 | 1.5               | 0.2 | 1.7                    | 0.3 | 3.6                   | 0.4 |
| <b>48</b>                             | 9.9              | 0.6 | 3.3                    | 0.2 | 8.9              | 0.5 | 3.8               | 0.4 | 3.5                | 0.4 | 1.2               | 0.1 | 1.3                    | 0.1 | 2.6                   | 0.2 |
| <b>72</b>                             | 10.1             | 0.5 | 2.4                    | 0.4 | 6.5              | 0.5 | 2.7               | 0.3 | 2.7                | 0.5 | 0.8               | 0.2 | 1.0                    | 0.1 | 1.9                   | 0.3 |
| <b>86Y-NM600 in 4T07 bearing mice</b> |                  |     |                        |     |                  |     |                   |     |                    |     |                   |     |                        |     |                       |     |
| <b>4</b>                              | 5.4              | 0.6 | 10.1                   | 0.4 | 8.2              | 0.3 | 3.9               | 0.9 | 5.3                | 0.4 | 1.9               | 0.1 | 2.2                    | 0.1 | 3.4                   | 0.1 |
| <b>24</b>                             | 11.8             | 1.3 | 6.0                    | 0.3 | 9.3              | 1.1 | 3.4               | 0.2 | 4.5                | 0.3 | 1.5               | 0.2 | 1.8                    | 0.3 | 3.0                   | 0.2 |
| <b>48</b>                             | 12.9             | 1.3 | 3.3                    | 0.3 | 7.5              | 0.5 | 3.1               | 0.4 | 3.6                | 0.1 | 1.2               | 0.1 | 1.4                    | 0.3 | 2.5                   | 0.2 |
| <b>72</b>                             | 12.3             | 2.2 | 2.4                    | 0.1 | 5.8              | 0.6 | 1.8               | 0.8 | 3.0                | 0.2 | 1.6               | 1.0 | 1.1                    | 0.2 | 2.1                   | 0.2 |

**Supplemental table 2** Results of *ex vivo* biodistribution in mice bearing 4T07 or 4T1 tumors grafts, and administered either <sup>86</sup>Y-NM600 (9.25 MBq) or <sup>177</sup>Lu-NM600 (9.25 MBq), 72 h post-injection. Data is presented as %IA/g (mean ± SD).

| Agent       | 4T07 bearing mice     |      |                         |      | 4T1 bearing mice      |      |                         |      |
|-------------|-----------------------|------|-------------------------|------|-----------------------|------|-------------------------|------|
|             | <sup>86</sup> Y-NM600 |      | <sup>177</sup> Lu-NM600 |      | <sup>86</sup> Y-NM600 |      | <sup>177</sup> Lu-NM600 |      |
| Tissue      | Mean*                 | SD   | Mean*                   | SD   | Mean*                 | SD   | Mean*                   | SD   |
| Tumor       | 17.31                 | 0.80 | 17.67                   | 7.48 | 9.47                  | 2.40 | 10.67                   | 0.08 |
| Blood       | 2.89                  | 0.27 | 3.19                    | 0.51 | 2.01                  | 0.49 | 2.45                    | 0.25 |
| Skin        | 2.56                  | 0.51 | 1.94                    | 0.48 | 1.47                  | 0.28 | 2.32                    | 0.44 |
| Muscle      | 0.78                  | 0.17 | 0.52                    | 0.02 | 0.62                  | 0.35 | 0.46                    | 0.05 |
| Bone/Marrow | 1.02                  | 0.27 | 0.94                    | 0.34 | 0.51                  | 0.16 | 0.98                    | 0.05 |
| Heart       | 2.09                  | 0.23 | 2.12                    | 0.18 | 1.55                  | 0.29 | 1.94                    | 0.41 |
| Lung        | 3.91                  | 0.16 | 3.50                    | 0.61 | 1.95                  | 0.61 | 2.36                    | 0.27 |
| Liver       | 8.31                  | 2.56 | 8.21                    | 0.47 | 8.98                  | 1.08 | 7.45                    | 0.27 |
| Kidney      | 5.45                  | 0.79 | 5.10                    | 0.19 | 3.77                  | 0.91 | 4.44                    | 0.21 |
| Spleen      | 3.44                  | 0.50 | 2.70                    | 0.11 | 3.48                  | 0.68 | 2.64                    | 0.43 |
| Pancreas    | 1.19                  | 0.14 | 1.37                    | 0.06 | 1.12                  | 0.28 | 1.15                    | 0.15 |
| Stomach     | 1.07                  | 0.12 | 0.8                     | 0.17 | 0.58                  | 0.38 | 0.97                    | 0.12 |
| Intestine   | 1.96                  | 0.17 | 1.41                    | 0.15 | 0.99                  | 0.33 | 1.15                    | 0.39 |
| Brain       | 0.17                  | 0.02 | 0.13                    | 0.04 | 0.08                  | 0.03 | 0.16                    | 0.03 |

\*data is presented as percent injected activity per gram of tissue (%IA/g)

**Supplemental table 3** Summary of results from the dosimetry estimation for <sup>90</sup>Y-NM600 using longitudinal <sup>86</sup>Y-NM600 PET/CT data and The Standard Mouse Model.

| Target Organ    | Cumulative Activity<br>[(MBq-sec)/MBq] | $\sum_s \phi_B(r_t \leftarrow r_s)(\tilde{A}_s)$ | Absorbed Dose<br>(Gy/MBq) | Dose<br>(9.25 MBq) |
|-----------------|----------------------------------------|--------------------------------------------------|---------------------------|--------------------|
| <b>Liver</b>    | 28644.57                               | 21282.91                                         | 3.04                      | 28.1               |
| <b>Spleen</b>   | 1332.53                                | 1044.35                                          | 1.74                      | 16.1               |
| <b>Kidney</b>   | 3980.59                                | 3058.51                                          | 1.73                      | 16.0               |
| <b>Lungs</b>    | 1361.76                                | 3344.07                                          | 3.34                      | 30.9               |
| <b>Heart</b>    | 1943.09                                | 1451.62                                          | 1.89                      | 17.5               |
| <b>Stomach</b>  | 1588.72                                | 2322.27                                          | 1.99                      | 18.4               |
| <b>S bowel</b>  | 7970.82                                | 10947.58                                         | 1.87                      | 17.3               |
| <b>L bowel</b>  | 3014.02                                | 2799.23                                          | 1.26                      | 11.7               |
| <b>Thyroid</b>  | 953.23                                 | 963.16                                           | 1.37                      | 12.7               |
| <b>Tumor</b>    | 26004.45                               | 17978.74                                         | 2.69                      | 24.9               |
| <b>Pancreas</b> | 953.23                                 | 662.53                                           | 0.95                      | 8.7                |
| <b>Bone</b>     | 998.62                                 | 1041.73                                          | 1.42                      | 13.1               |
| <b>Marrow</b>   | 30.80                                  | 47.16                                            | 0.79                      | 7.3                |
| <b>Carcass</b>  | 191699.11                              | 194828.76                                        | 1.38                      | 12.8               |

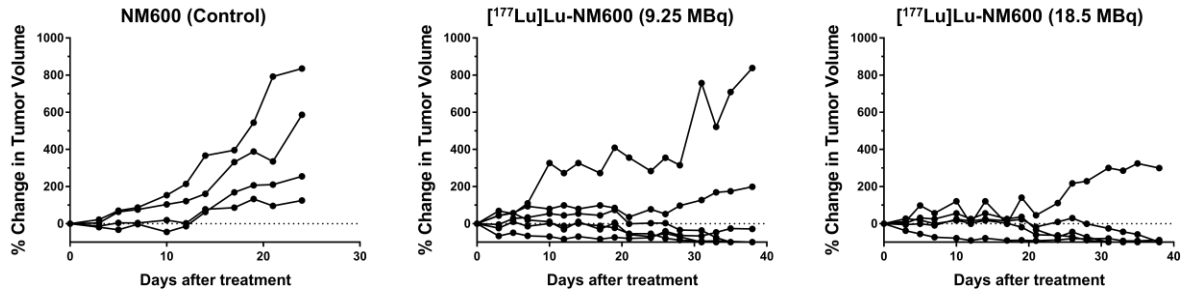

**Supplemental figure 3** Individual weight of mice bearing s.c. 4T07 tumors injected with unlabeled NM600, or 9.25 or 18.5 MBq of <sup>90</sup>Y-NM600. Data are presents as percent of the initial weight.

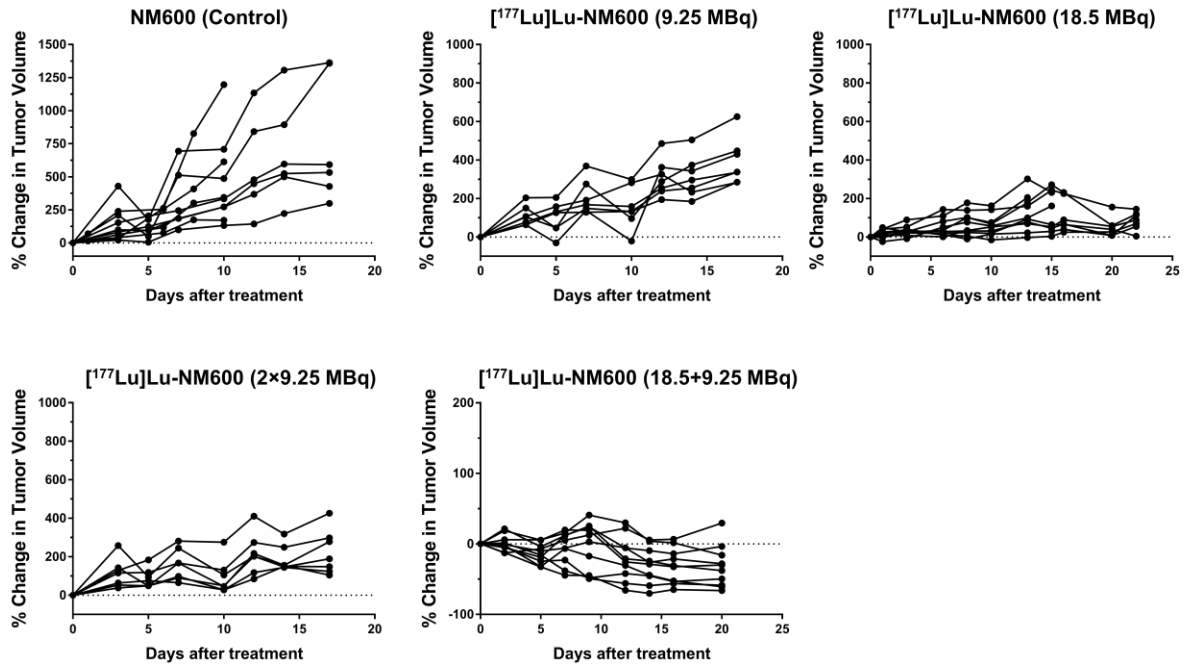

**Supplemental figure 4** Individual tumor growth curves of mice bearing s.c. 4T1 tumors injected with unlabeled NM600, 9.25, 18.5, 2x9.25, or 18.5 + 9.25 MBq of  $^{177}\text{Lu}$ -NM600. Data are presented as a fraction of the initial tumor volume.
